# Supplementary material for: Resting salivary flow independently associated with oral malodor
Source: Springer Nature journal article supplement (doi:10.1186/s12903-016-0255-3), 2016-07-19
Supplement: MOESM1 [file 10502930]

| No | Sex | halimeter | CHS3(Ng/10m) | CHS3(Ng/10m) | CHS3(Ng/10m) | total VSC(mg/10ml) | OLSD-5 | teeth | caries | filling | TC51-4 | Color of tongue (white) | PPD >15mm | 2white-yellow | with BOP* | lyes Zn* | PPD mm | mobility Iyes | plaque index | BOP*  | stimulated saliva ml/min | resting saliva ml/min | tongue moisture | buccal moisture | smoking Icurrent | Zbefore | I3non |
|----|-----|-----------|--------------|--------------|--------------|--------------------|--------|-------|--------|---------|--------|-------------------------|-----------|---------------|-----------|----------|--------|---------------|--------------|-------|--------------------------|-----------------------|-----------------|-----------------|------------------|---------|-------|
| 1  | 1   | 280       | 2.07         | 0.85         | 0.27         | 3.19               | 2.75   | 28    | 0      | 2       | 2      | 2                       | 2         | 2             | 2         | 2        | 2      | 2             | 0.33         | 0.6   | 15                       | 0.04                  | 0.33            | 0.22            | 332              | 331     | 1     |
| 2  | 1   | 112       | 1.544        | 0.604        | 0.452        | 2.6                | 2.5    | 28    | 0      | 2       | 3      | 2                       | 2         | 2             | 2         | 3        | 2      | 0.29          | 1.19         | 17.5  | 0.21                     | 0.21                  | 0.29            | 293             | 30               | 1       |       |
| 3  | 2   | 30        | 0.054        | 0.064        | 0            | 0.118              | 0.5    | 27    | 0      | 0       | 16     | 2                       | 2         | 2             | 2         | 3        | 2      | 0.58          | 1.23         | 3.5   | 0.2                      | 0.2                   | 0.27            | 267             | 333              | 3       |       |
| 5  | 2   | 773       | 11.104       | 3.748        | 0.928        | 15.778             | 3.25   | 23    | 0      | 16      | 2      | 2                       | 2         | 1             | 3.2       | 2        | 0.38   | 4.35          | 5            | 0.13  | 0.13                     | 0.13                  | 31              | 302             | 2                | 3       |       |
| 6  | 2   | 285       | 3.438        | 2.41         | 1.706        | 7.554              | 2      | 28    | 0      | 13      | 1      | 2                       | 1         | 3.1           | 2         | 0.54     | 1.19   | 14.4          | 0.15         | 0.15  | 0.15                     | 288                   | 267             | 3               | 3                |         |       |
| 7  | 2   | 103       | 1.982        | 1.188        | 1.548        | 5.028              | 2.5    | 28    | 0      | 19      | 1      | 2                       | 2         | 3             | 2         | 0.5      | 7.34   | 13            | 0.28         | 0.304 | 0.28                     | 0.28                  | 315             | 315             | 1                | 3       |       |
| 8  | 2   | 166       | 1.002        | 1.14         | 0.992        | 3.134              | 2.25   | 29    | 1      | 18      | 1      | 2                       | 1         | 3.8           | 2         | 0.83     | 2.76   | 6             | 0.13         | 0.13  | 0.13                     | 325                   | 334             | 3               | 3                |         |       |
| 9  | 2   | 437       | 5.822        | 2.878        | 1.834        | 10.534             | 3      | 27    | 2      | 13      | 1      | 2                       | 1         | 3.1           | 1         | 0.46     | 2.47   | 5             | 0.05         | 0.13  | 0.13                     | 313                   | 334             | 3               | 3                |         |       |
| 10 | 1   | 35        | 0            | 0            | 0.344        | 0.344              | 2      | 28    | 0      | 22      | 1      | 1                       | 2         | 2.9           | 2         | 0.87     | 2.56   | 8.5           | 0.13         | 0.13  | 0.13                     | 31                    | 316             | 3               | 3                |         |       |
| 11 | 2   | 95        | 0.104        | 0.172        | 0.368        | 0.644              | 1.75   | 23    | 0      | 18      | 1      | 2                       | 2         | 3.1           | 2         | 0.42     | 5.07   | 3             | 0.12         | 0.12  | 0.12                     | 324                   | 316             | 3               | 3                |         |       |
| 12 | 2   | 131       | 1.618        | 0.444        | 0.112        | 2.174              | 2.5    | 28    | 1      | 20      | 1      | 2                       | 2         | 3             | 2         | 0.36     | 1.19   | 5.5           | 0.04         | 0.11  | 0.11                     | 301                   | 302             | 3               | 3                |         |       |
| 13 | 2   | 49        | 0.192        | 0.148        | 0.322        | 0.662              | 1      | 28    | 1      | 5       | 0      | 99                      | 2         | 3             | 2         | 0.25     | 5.56   | 12            | 0.31         | 0.31  | 0.31                     | 285                   | 285             | 1               | 3                |         |       |
| 14 | 2   | 96        | 2.112        | 2.07         | 1.272        | 5.454              | 2.25   | 24    | 3      | 11      | 2      | 2                       | 1         | 3.8           | 2         | 1.25     | 5.42   | 13.75         | 0.16         | 0.16  | 0.16                     | 283                   | 254             | 3               | 3                |         |       |
| 15 | 1   | 30        | 0.088        | 0.07         | 0.35         | 0.508              | 0.25   | 21    | 0      | 0       | 21     | 1                       | 2         | 2             | 3         | 2        | 0.17   | 0             | 13.75        | 0.55  | 0.55                     | 0.55                  | 282             | 282             | 2                | 2       |       |
| 16 | 1   | 111       | 0.47         | 0.748        | 0.586        | 1.784              | 2      | 28    | 0      | 17      | 3      | 1                       | 1         | 3.46          | 2         | 0.33     | 17.3   | 15            | 0.1          | 0.1   | 0.1                      | 257                   | 282             | 2               | 2                |         |       |
| 17 | 2   | 133       | 2.332        | 1.446        | 0.8          | 4.58               | 2      | 28    | 0      | 4       | 2      | 2                       | 2         | 3             | 2         | 0.29     | 0      | 3.5           | 0.01         | 0.01  | 0.01                     | 237.5                 | 30              | 3               | 3                |         |       |
| 18 | 2   | 133       | 4.436        | 4.55         | 2.02         | 11.006             | 3      | 23    | 2      | 8       | 2      | 2                       | 1         | 4.04          | 1         | 1.42     | 12.3   | 4.5           | 0.06         | 0.06  | 0.06                     | 22.45                 | 285.5           | 3               | 3                |         |       |
| 19 | 1   | 162       | 0.402        | 3.342        | 1.036        | 4.78               | 3      | 24    | 0      | 17      | 1      | 1                       | 1         | 3.27          | 1         | 0.38     | 17.5   | 5.5           | 0.11         | 0.11  | 0.11                     | 21.2                  | 257.5           | 1               | 1                |         |       |
| 20 | 1   | 233       | 2.106        | 4.08         | 0.91         | 7.076              | 3      | 24    | 0      | 17      | 2      | 1                       | 1         | 3.79          | 1         | 0.5      | 13.2   | 4             | 0.07         | 0.07  | 0.07                     | 23.45                 | 293.5           | 1               | 1                |         |       |
| 21 | 2   | 162       | 0.464        | 0.752        | 0.678        | 1.894              | 2.5    | 31    | 1      | 17      | 1      | 2                       | 1         | 3.2           | 2         | 0.63     | 8.6    | 11            | 0.02         | 0.02  | 0.02                     | 30.2                  | 272             | 3               | 3                |         |       |
| 22 | 2   | 204       | 4.17         | 2.476        | 1.058        | 7.704              | 3      | 25    | 0      | 13      | 2      | 2                       | 2         | 3             | 2         | 0.42     | 2.67   | 7.5           | 0.11         | 0.11  | 0.11                     | 25.55                 | 285.5           | 3               | 3                |         |       |
| 23 | 1   | 475       | 3.912        | 3.114        | 2.054        | 9.08               | 3.5    | 28    | 0      | 2       | 3      | 2                       | 1         | 3.7           | 2         | 1        | 17.3   | 5             | 0.2          | 0.2   | 0.2                      | 287.5                 | 304.5           | 3               | 3                |         |       |
| 24 | 2   | 148       | 3.466        | 0.294        | 0.526        | 4.286              | 2.75   | 28    | 0      | 11      | 2      | 3                       | 2         | 2.8           | 2         | 0.21     | 3.57   | 5             | 0.43         | 0.43  | 0.43                     | 33                    | 329.5           | 3               | 3                |         |       |
| 25 | 2   | 237       | 2.076        | 3.242        | 5.62         | 15.938             | 3      | 28    | 0      | 13      | 2      | 2                       | 2         | 3             | 2         | 0.5      | 8.83   | 6             | 0.33         | 0.33  | 0.33                     | 28.45                 | 303.5           | 3               | 3                |         |       |
| 42 | 1   | 96        | 0.528        | 0.31         | 0.576        | 1.414              | 2.25   | 29    | 0      | 17      | 1      | 2                       | 2         | 3.16          | 2         | 0.21     | 0      | 2             | 0.17         | 0.17  | 0.17                     | 28.8                  | 256             | 3               | 3                |         |       |
| 43 | 1   | 146       | 0.984        | 0.628        | 0.388        | 1.6                | 1.25   | 28    | 0      | 13      | 2      | 1                       | 2         | 3.05          | 2         | 0.54     | 0.1    | 5             | 0.19         | 0.19  | 0.19                     | 29.9                  | 291             | 3               | 3                |         |       |
| 44 | 2   | 67        | 0.0146       | 0.064        | 0            | 0.0786             | 1.5    | 32    | 0      | 4       | 1      | 1                       | 2         | 3.03          | 2         | 0.29     | 5.21   | 9             | 0.28         | 0.28  | 0.28                     | 31.1                  | 307.3           | 3               | 3                |         |       |
| 45 | 2   | 99        | 0.67         | 0.276        | 0.588        | 1.544              | 1.75   | 25    | 0      | 8       | 1      | 2                       | 1         | 2.7           | 1         | 0.33     | 13.3   | 12            | 0.05         | 0.05  | 0.05                     | 30.9                  | 286.5           | 3               | 3                |         |       |
| 46 | 2   | 183       | 2.39         | 3.182        | 1.692        | 7.264              | 2      | 23    | 0      | 17      | 0      | 99                      | 2         | 3.02          | 2         | 0.33     | 0.42   | 1             | 0.08         | 0.08  | 0.08                     | 24.8                  | 287.3           | 3               | 3                |         |       |
| 47 | 2   | 145       | 1.562        | 0.44         | 0.286        | 2.288              | 2.5    | 23    | 0      | 13      | 0      | 99                      | 1         | 2.78          | 1         | 0.5      | 6.52   | 2.5           | 0.16         | 0.16  | 0.16                     | 25.2                  | 312             | 3               | 3                |         |       |
| 48 | 1   | 477       | 3.54         | 0.838        | 0.298        | 4.776              | 2.5    | 29    | 0      | 19      | 2      | 2                       | 1         | 3.36          | 2         | 0.21     | 12.07  | 7             | 0.32         | 0.32  | 0.32                     | 30.4                  | 304.5           | 1               | 1                |         |       |
| 48 | 1   | 272       | 2.474        | 0.85         | 0.37         | 3.468              | 1.75   | 29    | 0      | 16      | 1      | 2                       | 2         | 2.83          | 2         | 0.5      | 5.17   | 7             | 0.14         | 0.14  | 0.14                     | 30.3                  | 315             | 1               | 1                |         |       |
| 50 | 1   | 146       | 1.09         | 0.38         | 0            | 1.47               | 1.5    | 29    | 0      | 16      | 2      | 2                       | 1         | 3             | 2         | 0.29     | 7.47   | 7             | 0.16         | 0.16  | 0.16                     | 33                    | 328.5           | 1               | 1                |         |       |
| 51 | 2   | 106       | 9.402        | 5.466        | 3.806        | 18.674             | 2      | 28    | 0      | 0       | 1      | 1                       | 2         | 3             | 2         | 0.5      | 20.8   | 12            | 0.4          | 0.4   | 0.4                      | 32.5                  | 326.5           | 3               | 3                |         |       |
| 52 | 2   | 426       | 5.852        | 1.882        | 0.4          | 8.134              | 2.25   | 30    | 0      | 18      | 2      | 1                       | 2         | 3.03          | 2         | 0.71     | 0.56   | 11            | 0.13         | 0.13  | 0.13                     | 12.9                  | 318             | 3               | 3                |         |       |
| 53 | 1   | 43        | 0.088        | 0            | 0            | 0.088              | 1.25   | 30    | 0      | 19      | 0      | 99                      | 2         | 3.05          | 2         | 0.42     | 2.67   | 7.5           | 0.15         | 0.15  | 0.15                     | 25.55                 | 285.5           | 3               | 3                |         |       |
| 54 | 1   | 217       | 9.548        | 2.652        | 1.52         | 14.12              | 2      | 27    | 0      | 12      | 2      | 2                       | 2         | 2.54          | 2         | 0.17     | 2.47   | 16.25         | 0.17         | 0.17  | 0.17                     | 30.75                 | 284             | 3               | 3                |         |       |
| 55 | 2   | 148       | 0.928        | 0.79         | 0.76         | 2.478              | 1.5    | 28    | 0      | 19      | 1      | 2                       | 2.85      | 2             | 0         | 0        | 11     | 0.14          | 0.14         | 0.14  | 28.4                     | 258                   | 3               | 3               |                  |         |       |
| 56 | 1   | 45        | 4.634        | 2.482        | 0.936        | 8.052              | 3.25   | 5     | 0      | 5       | 3      | 2                       | 1         | 4.7           | 1         | 0.5      | 6.7    | 13            | 0.24         | 0.24  | 0.24                     | 29.9                  | 314             | 2               | 2                |         |       |
| 57 | 1   | 96        | 2.892        | 1.222        | 0.628        | 4.742              | 3      | 5     | 0      | 5       | 2      | 2                       | 1         | 4.4           | 1         | 0.5      | 10     | 17.5          | 0.22         | 0.22  | 0.22                     | 30.3                  | 294             | 2               | 2                |         |       |
| 58 | 2   | 209       | 2.192        | 1.624        | 2.128        | 6.944              | 1.75   | 28    | 0      | 13      | 2      | 2                       | 2         | 3             | 2         | 0.29     | 7.14   | 11.5          | 0.04         | 0.04  | 0.04                     | 28.4                  | 287             | 3               | 3                |         |       |
| 58 | 2   | 282       | 2.722        | 2.018        | 1.684        | 6.424              | 1.75   | 28    | 0      | 13      | 2      | 2                       | 2         | 3             | 2         | 0.375    | 10.1   | 11            | 0.2          | 0.2   | 0.2                      | 27                    | 271             | 3               | 3                |         |       |
| 60 | 2   | 327       | 3.32         | 1.518        | 1.202        | 6.04               | 2      | 28    | 0      | 13      | 2      | 2                       | 2         | 2.75          | 2         | 0.25     | 4.76   | 11            | 0.32         | 0.32  | 0.32                     | 31.6                  | 31              | 3               | 3                |         |       |
| 61 | 2   | 107       | 0.234        | 0.334        | 0.588        | 1.166              | 2      | 24    | 2      | 4       | 1      | 1                       | 2         | 2.98          | 2         | 0.71     | 20.8   | 5             | 0.26         | 0.26  | 0.26                     | 31.5                  | 323             | 3               | 3                |         |       |
| 62 | 1   | 165       | 2.628        | 0.34         | 0.208        | 3.176              | 1.5    | 28    | 0      | 5       | 1      | 2                       | 2         | 3             | 2         | 0.542    | 0      | 9             | 0.13         | 0.13  | 0.13                     | 29.3                  | 294             | 3               | 3                |         |       |
| 63 | 1   | 39        | 0.058        | 0            | 0            | 0.058              | 2.25   | 26    | 0      | 19      | 2      | 2                       | 1         | 3.33          | 1         | 0.46     | 8.85   | 5             | 0.04         | 0.04  | 0.04                     | 26.7                  | 272             | 2               | 2                |         |       |
| 64 | 1   | 387       | 4.512        | 1.52         | 0.878        | 6.91               | 2.25   | 31    | 1      | 17      | 1      | 2                       | 2         | 2.84          | 2         | 0.42     | 6.65   | 12.5          | 0.07         | 0.07  | 0.07                     | 28.2                  | 283             | 3               | 3                |         |       |
| 65 | 2   | 155       | 1.502        | 0.758        | 0.492        | 2.752              | 1.75   | 29    | 0      | 7       | 1      | 1                       | 2         | 3             | 2         | 0.25     | 17.2   | 11.1          | 0.1          | 0.1   | 0.1                      | 25.3                  | 272             | 3               | 3                |         |       |
| 66 | 2   | 228       | 2.218        | 1.93         | 0.644        | 4.792              | 3.25   | 17    | 1      | 12      | 2      | 2                       | 1         | 2.94          | 1         | 0.58     | 11.8   | 9             | 0.01         | 0.01  | 0.01                     | 28.45                 | 285             | 3               | 3                |         |       |
| 67 | 1   | 163       | 1.356        | 1.294        | 1            | 3.65               | 2.25   | 27    | 0      | 23      | 1      | 1                       | 2         | 3.02          | 2         | 0.67     | 8.02   | 4.5           | 0.15         | 0.15  | 0.15                     | 27.5                  | 28              | 2               | 2                |         |       |
| 68 | 2   | 31        | 0.138        | 0.044        | 0            | 0.182              | 3      | 14    | 0      | 10      | 2      | 2                       | 1         | 3.21          | 2         | 0.375    | 4.76   | 4.5           | 0.03         | 0.03  | 0.03                     | 27.2                  | 265             | 1               | 1                |         |       |
| 69 | 2   | 46        | 0.822        | 0.338        | 0.578        | 1.738              | 1.25   | 26    | 0      | 21      | 1      | 2                       | 2         | 3             | 2         | 0.33     | 12.8   | 4             | 0.11         | 0.11  | 0.11                     | 29.9                  | 301             | 3               | 3                |         |       |
| 70 | 2   | 120       | 0.928        | 0.634        | 1.63         | 3.192              | 2      | 28    | 0      | 12      | 0      | 99                      | 1         | 3.25          | 2         | 0.92     | 13.11  | 11.25         | 0.66         | 0.66  | 0.66                     | 31.4                  | 338             | 3               | 3                |         |       |
| 71 | 1   | 283       | 9.696        | 3.658        | 1.244        | 14.988             | 2.5    | 28    | 0      | 6       | 2      | 1                       | 1         | 3.09          | 2         | 0.625    | 14.9   | 2.5           | 0.08         | 0.08  | 0.08                     | 31                    | 312             | 2               | 2                |         |       |
| 72 | 2   | 76        | 0.644        | 0.282        | 0.55         | 1.458              | 1.25   | 28    | 0      | 14      | 0      | 99                      | 2         | 2.93          | 2         | 0.42     | 9.52   | 4.5           | 0.12         | 0.12  | 0.12                     | 30.2                  | 294             | 3               | 3                |         |       |
| 73 | 2   | 356       | 4.872        | 1.5          | 0.788        | 7.14               | 2.75   | 23    | 0      | 14      | 2      | 2                       | 2         | 3.43          | 2         | 0.21     | 4.34   | 6             | 0.01         | 0.01  | 0.01                     | 29.65                 | 282.5           | 3               | 3                |         |       |
| 74 | 1   | 66        | 0.684        | 0.138        | 0.228        | 1.048              | 1      | 25    | 1      | 15      | 1      | 1                       | 2         | 3.06          | 2         | 0.17     | 31.3   | 12.5          | 0.12         | 0.12  | 0.12                     | 25.5                  | 29              | 3               | 3                |         |       |
| 75 | 2   | 213       | 3.564        | 1.95         | 0.968        | 6.482              | 3      | 28    | 0      | 7       | 0      | 99                      | 2         | 4.75          | 2         | 0.79     | 80.4   | 5.5           | 0.07         | 0.07  | 0.07                     | 30.5                  | 294.5           | 3               | 3                |         |       |
| 76 | 1   | 288       | 4.142        | 1.064        | 1.126        | 6.332              | 2.5    | 28    | 0      | 15      | 1      | 1                       | 2         | 3.04          | 2         | 0.42     | 2.88   | 5.5           | 0.05         | 0.05  | 0                        |                       |                 |                 |                  |         |       |
